# Supplementary material
Source: PubMed Central journal article supplement (PMC4609711)

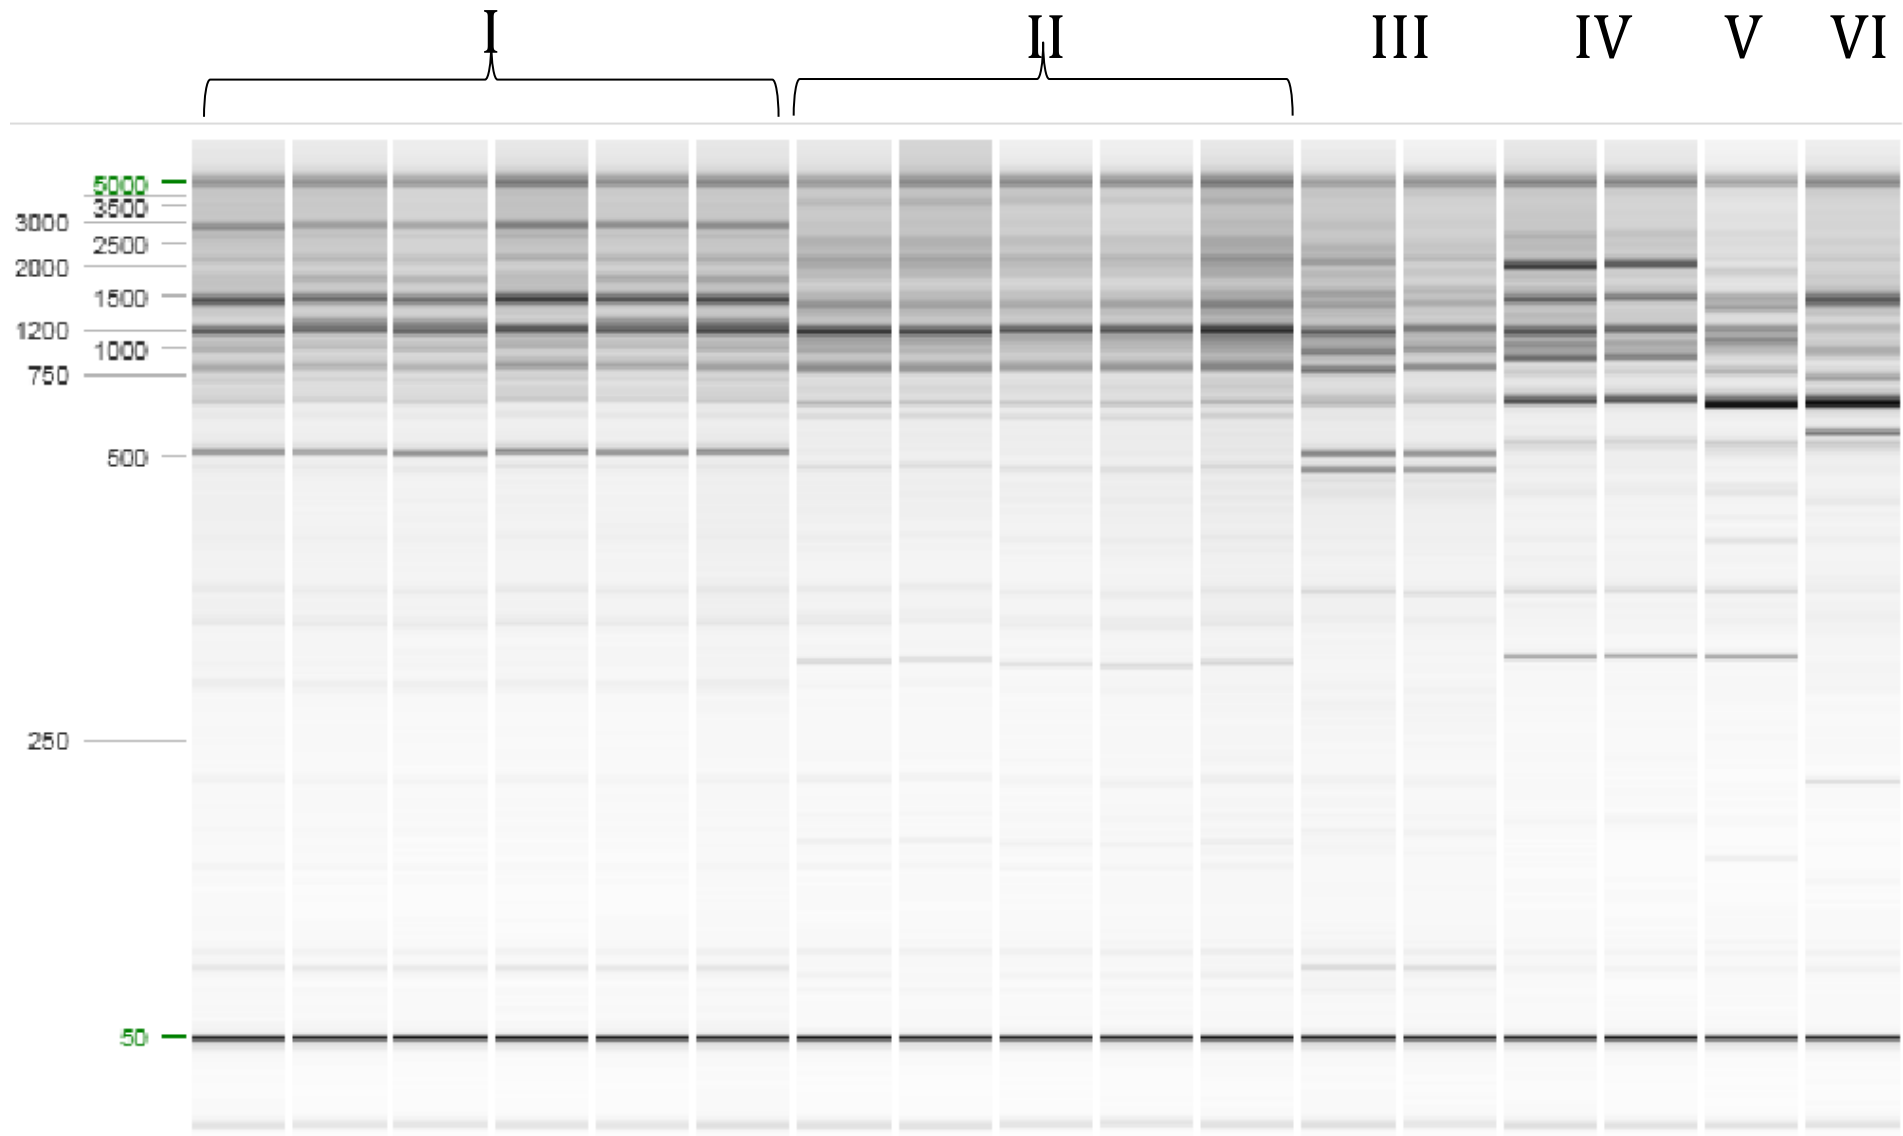

**Figure S1.** Representation of ESBL-producing *E. coli* REP-PCR types in dairy farm no. 16.

Supplement: JCM.01915-15_zjm999094576so1.pdf [file JCM.01915-15_zjm999094576so1.pdf]
